# Supplementary material for: Urinary cell cycle arrest biomarkers and chitinase 3-like protein 1 (CHI3L1) to detect acute kidney injury in the critically ill: a post hoc laboratory analysis on the FINNAKI cohort
Source: Springer Nature journal article supplement (doi:10.1186/s13054-020-02867-w), 2020-04-10
Supplement: MOESM1 [file 17885678]

**Additional file table 1.** Diagnostic performance of biomarkers and biomarker combinations for any stage of AKI defined by KDIGO occurring at 24 hours (n= 120, 18.2%).

| Biomarker                                              | Area under the curve   | Cut off value | Sensitivity          | Specificity          | Positive LR         | Negative LR         |
|--------------------------------------------------------|------------------------|---------------|----------------------|----------------------|---------------------|---------------------|
| uCHI3L1<br>(ng/mL)                                     | 0.651<br>(0.593-0.708) | >3.1          | 48.3%<br>(39.1-57.6) | 81.4%<br>(77.9-84.7) | 2.61<br>(2.02-3.37) | 0.63<br>(0.53-0.76) |
| NephroCheck Risk®<br>(ng/mL) <sup>2</sup> /1000        | 0.681<br>(0.626-0.737) | >0.3          | 68.3%<br>(59.2-76.5) | 59.4%<br>(55.2-63.6) | 1.68<br>(1.44-1.98) | 0.53<br>(0.41-0.70) |
| NephroCheck Risk®<br>(ng/mL) <sup>2</sup> /1000        |                        | >2.0          | 28.3%<br>(20.5-37.3) | 89.8%<br>(86.9-92.2) | 2.78<br>(1.90-4.06) | 0.80<br>(0.71-0.90) |
| uCHI3L1•TIMP-2<br>(ng/mL) <sup>2</sup>                 | 0.692<br>(0.639-0.745) | >3.73         | 64.2%<br>(54.9-72.7) | 65.7%<br>(61.6-69.7) | 1.87<br>(1.57-2.24) | 0.55<br>(0.43-0.70) |
| uCHI3L1•IGFBP7<br>(ng/mL) <sup>2</sup>                 | 0.674<br>(0.618-0.729) | >507.1        | 45.0%<br>(35.9-54.3) | 84.1%<br>(80.7-87.1) | 2.83<br>(2.14-3.73) | 0.65<br>(0.55-0.77) |
| uCH3L1•NephroCheck Risk®<br>(ng/mL) <sup>3</sup> /1000 | 0.688<br>(0.634-0.743) | >1.28         | 51.7%<br>(42.4-50.9) | 78.0%<br>(74.2-81.4) | 2.34<br>(1.85-2.96) | 0.62<br>(0.51-0.75) |

95% confidence intervals in parenthesis.

LR; likelihood ratio

**Additional file table 2.** Diagnostic performance of biomarkers and biomarker combinations for any stage of AKI defined by KDIGO occurring at 48 hours (n=88, 13.3%).

| Biomarker                                              | Area under the curve   | Cut off value | Sensitivity          | Specificity          | Positive LR         | Negative LR          |
|--------------------------------------------------------|------------------------|---------------|----------------------|----------------------|---------------------|----------------------|
| uCHI3L1<br>(ng/mL)                                     | 0.623<br>(0.555-0.691) | >2.1          | 54.5%<br>(43.6-65.2) | 73.8%<br>(70.0-77.3) | 2.08<br>(1.64-2.63) | 0.62%<br>(0.49-0.78) |
| NephroCheck Risk®<br>(ng/mL) <sup>2</sup> /1000        | 0.662<br>(0.599-0.726) | >0.3          | 65.9%<br>(55.0-75.7) | 57.5%<br>(53.3-61.6) | 1.55<br>(1.30-1.85) | 0.59<br>(0.44-0.80)  |
| NephroCheck Risk®<br>(ng/mL) <sup>2</sup> /1000        |                        | >2.0          | 28.4%<br>(19.3-39.0) | 88.8%<br>(85.9-91.2) | 2.54<br>(1.69-3.80) | 0.81<br>(0.70-0.92)  |
| uCHI3L1•TIMP-2<br>(ng/mL) <sup>2</sup>                 | 0.668<br>(0.606-0.730) | >10.3         | 52.3%<br>(41.4-63.0) | 74.3%<br>(70.5-77.8) | 2.03<br>(1.59-2.59) | 0.91<br>(0.87-0.92)  |
| uCHI3L1•IGFBP7<br>(ng/mL) <sup>2</sup>                 | 0.642<br>(0.578-0.706) | >325.4        | 45.5%<br>(34.8-56.4) | 79.5%<br>(76.0-82.8) | 2.22<br>(1.68-2.94) | 0.69<br>(0.56-0.83)  |
| uCH3L1•NephroCheck Risk®<br>(ng/mL) <sup>3</sup> /1000 | 0.659<br>(0.596-0.723) | >1.1          | 51.1%<br>(40.2-61.9) | 75.0%<br>(71.2-78.5) | 2.04<br>(1.60-2.62) | 0.65<br>(0.52-0.81)  |

95% confidence intervals in parenthesis.

LR; likelihood ratio

**Additional file table 3.** Diagnostic performance of biomarkers and biomarker combinations for stage 2 or 3 AKI defined by KDIGO occurring at 48 hours (n=45, 6.8%).

| Biomarker                                              | Area under the curve    | Cut off value | Sensitivity          | Specificity          | Positive LR         | Negative LR         |
|--------------------------------------------------------|-------------------------|---------------|----------------------|----------------------|---------------------|---------------------|
| uCHI3L1<br>(ng/mL)                                     | 0.645<br>(0.554-0.736)  | >2.1          | 60.0%<br>(44.3-74.3) | 72.7%<br>(70.0-76.2) | 2.20<br>(1.67-2.88) | 0.55<br>(0.38-0.79) |
| NephroCheck Risk®<br>(ng/mL) <sup>2</sup> /1000        | 0.668<br>(0.581-0.755)  | >0.3          | 68.9%<br>(53.4-81.8) | 56.1%<br>(52.1-60.0) | 1.57<br>(1.26-1.95) | 0.55<br>(0.36-0.86) |
| NephroCheck Risk®<br>(ng/mL) <sup>2</sup> /1000        |                         | >2.0          | 28.8%<br>(16.4-44.3) | 87.6%<br>(84.8-90.1) | 2.34<br>(1.41-3.87) | 0.94<br>(0.92-0.96) |
| uCHI3L1•TIMP-2<br>(ng/mL) <sup>2</sup>                 | 0.695<br>(0.618-0.771)  | >4.5          | 66.7%<br>(51.0-80.0) | 65.0%<br>(61.1-68.8) | 1.91<br>(1.51-2.41) | 0.51<br>(0.34-0.78) |
| uCHI3L1•IGFBP7<br>(ng/mL) <sup>2</sup>                 | 0.658<br>(0.576-0.741)  | >507.1        | 46.7%<br>(31.7-62.1) | 80.7%<br>(77.3-83.7) | 2.41<br>(1.70-3.43) | 0.66<br>(0.50-0.87) |
| uCH3L1•NephroCheck Risk®<br>(ng/mL) <sup>3</sup> /1000 | 0.675 (<br>0.591-0.760) | >0.11         | 77.8%<br>(62.9-88.8) | 52.7%<br>(48.7-56.7) | 1.64<br>(1.38-1.96) | 0.42<br>(0.24-0.73) |

95% confidence intervals in parenthesis.

LR; likelihood ratio
